# Supplementary material for: Mechanical Force Modulates Alveolar Bone Marrow Mesenchymal Cells Characteristics for Bone Remodeling during Orthodontic Tooth Movement through Lactate Production
Source: MDPI journal article supplement (doi:10.3390/cells11233724), 2022-11-22
Supplement: s1 [file s1]

Supplement Figures

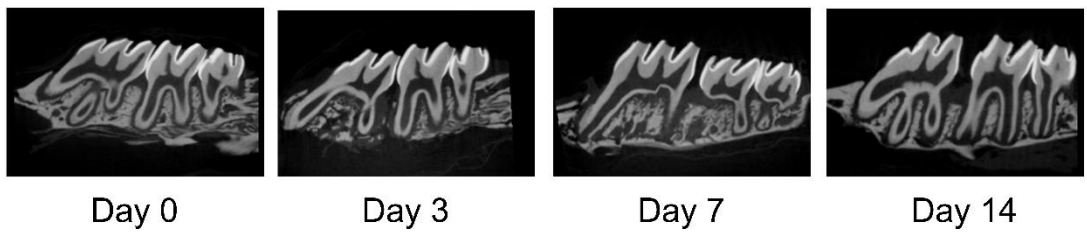

**Figure S1.** Micro-CT of control group and orthodontic tooth movement groups at day 3, 7, and 14.

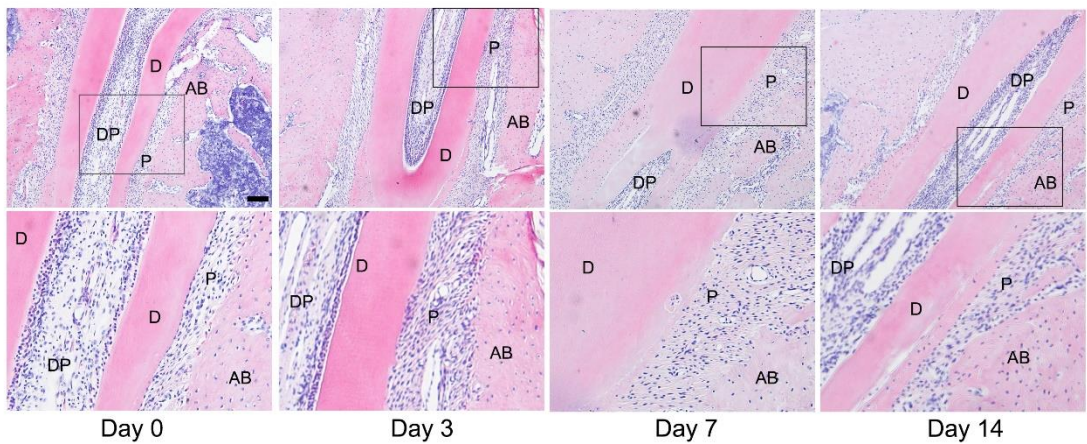

**Figure S2.** Haematoxylin and eosin staining of control group and orthodontic tooth movement groups at day 3, 7, and 14. D, dentin; DP, dental pulp; P, periodontal ligament; AB, alveolar bone.

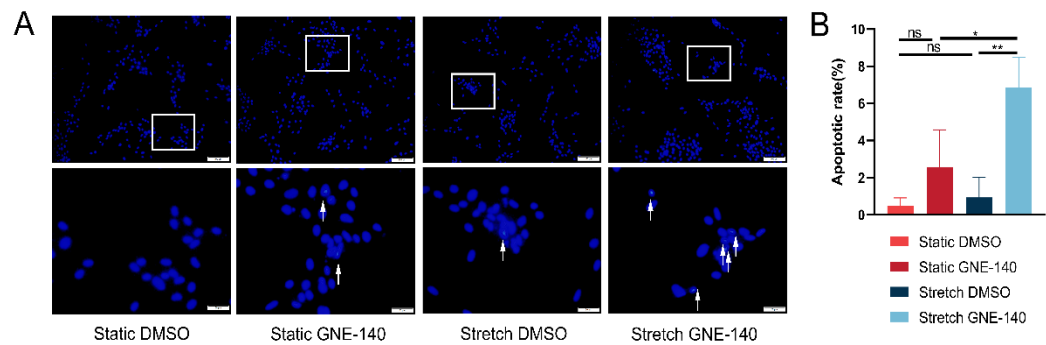

**Figure S3.** Hoechst staining of ABMMCs in GNE-140/DMSO treated groups with or without cyclic mechanical stretch. Upper panel: scale bar=200 $\mu$ m; Lower panel: scale bar=50 $\mu$ m.
